# Supplementary material for: Representation of disturbance in the Joint UK Land Environment Simulator Vn4.8 (JULES)
Source: Copernicus journal article supplement (doi:10.5194/gmd-2018-149), 2018-07-19
Supplement: Supplementary file 1 [file gmd-2018-149-supplement.pdf]

# Representation of disturbance in the Joint UK Land Environment Simulator Vn4.8 (JULES)

## Supplementary Information

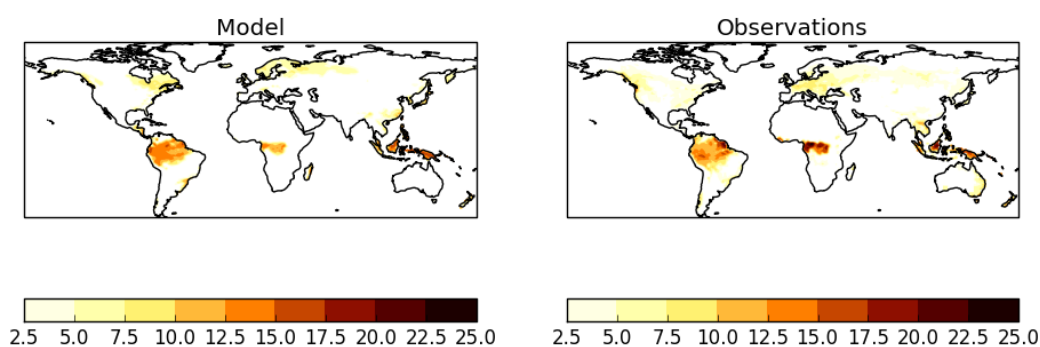

Figure SI-1: Vegetation carbon ( $\text{kg m}^{-2}$ ), as modelled by JULES-INFERNO (left panel) and observations from Avitabile et al (2016)

| Global                        | Trees                    | Shrubs                  | Grasses                 | Soil                     |
|-------------------------------|--------------------------|-------------------------|-------------------------|--------------------------|
| S2 no fire (S2)               | 26.28                    | 23.23                   | 16.52                   | 33.97                    |
| S3 no fire (S3)               | 21.46                    | 14.83                   | 28.91                   | 34.80                    |
| S2 + fire (S2F)               | 16.59                    | 10.57                   | 32.07                   | 40.77                    |
| S3 + fire (S3F)               | 15.08                    | 6.81                    | 37.50                   | 40.61                    |
| Observations (Obs)            | 23.01<br>(range = 22.06) | 10.95<br>(range = 2.87) | 32.94<br>(range = 3.40) | 33.10<br>(range = 25.56) |
| <b>% change S2 / S3F</b>      | <b>-42.60</b>            | <b>-70.69</b>           | <b>126.95</b>           | <b>19.54</b>             |
| <b>% difference S2 / Obs</b>  | <b>13.26</b>             | <b>71.83</b>            | <b>-66.38</b>           | <b>2.60</b>              |
| <b>% difference S3F / Obs</b> | <b>-41.61</b>            | <b>-46.66</b>           | <b>12.94</b>            | <b>20.38</b>             |

Table SI-1: Total vegetation (percentage) globally. The totals are shown for total tree cover, shrubs, grasses and bare soil, with and without disturbance as labelled. The percentage change between experiments and percentage difference compared to ESA CCI Observations is calculated and shown in the lower rows

| <b>Tropical forest</b>        | <b>Trees</b>  | <b>Shrubs</b> | <b>Grasses</b> | <b>Soil</b>   |
|-------------------------------|---------------|---------------|----------------|---------------|
| S2 no fire (S2)               | 66.57         | 15.85         | 15.18          | 2.41          |
| S3 no fire (S3)               | 55.34         | 9.76          | 32.40          | 2.50          |
| S2 + fire (S2F)               | 49.12         | 14.39         | 31.26          | 5.23          |
| S3 + fire (S3F)               | 44.05         | 8.15          | 42.72          | 5.08          |
| Observations (Obs)            | 53.25         | 12.46         | 29.88          | 4.42          |
|                               |               |               |                |               |
| <b>% change S2 / S3F</b>      | <b>-33.83</b> | <b>-48.57</b> | <b>181.43</b>  | <b>111.07</b> |
| <b>% difference S2 / Obs</b>  | <b>22.23</b>  | <b>23.92</b>  | <b>-65.24</b>  | <b>-58.80</b> |
| <b>% difference S3F / Obs</b> | <b>-18.91</b> | <b>-41.83</b> | <b>35.38</b>   | <b>14.08</b>  |

**Table SI-2: Total vegetation (percentage) for tropical forests. The totals are shown for total tree cover, shrubs, grasses and bare soil, with and without disturbance as labelled. The percentage change between experiments and percentage difference compared to ESA CCI Observations is calculated and shown in the lower rows**

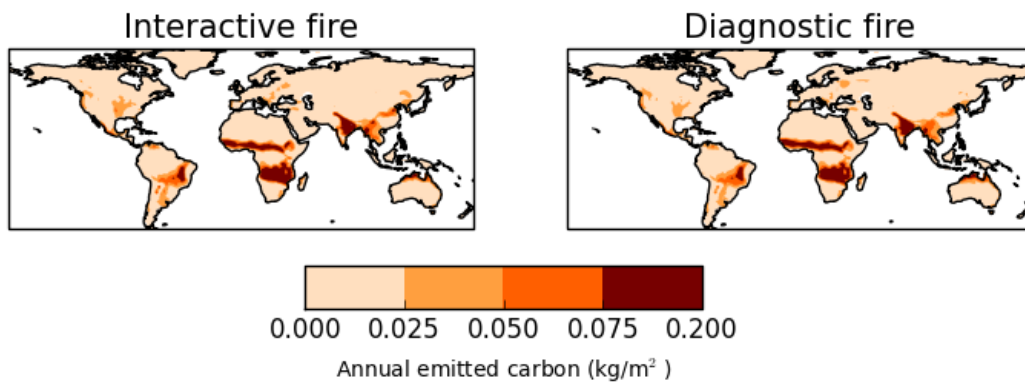

**Figure SI-2: Emitted carbon (kg m<sup>-2</sup>), as modelled by the coupled JULES-INFERNO (left panel) and diagnostic INFERNO as presented in Mangeon et al (2016) (right panel)**

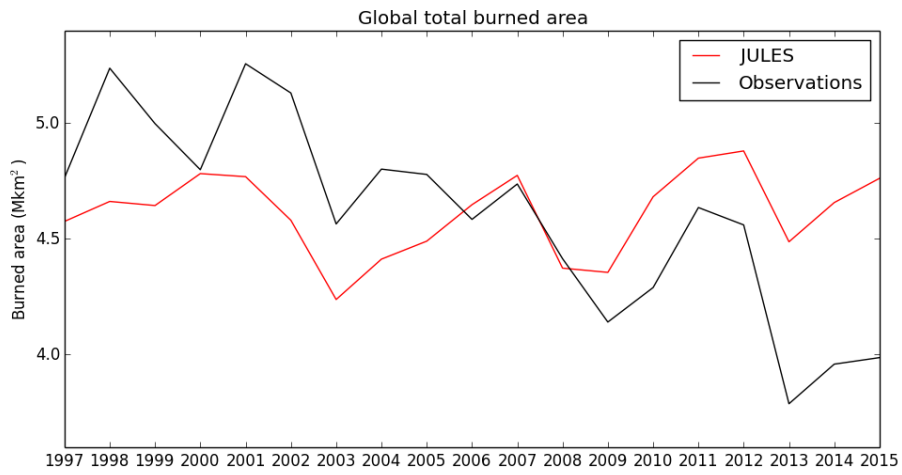

a

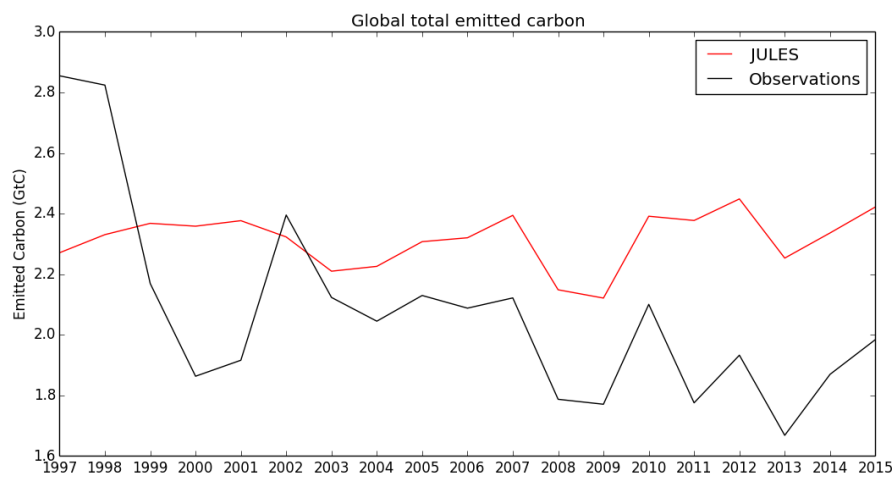

b

**Figure SI-3: Global total burnt area (Mkm<sup>2</sup>) (a) and global total emitted carbon (GtC) as modelled by JULES-INFERNO (red line) and GFED 4.1s (black line), from 1997-2015**

| Comparison       | Observations | Items/VCF field | CCI / JULES PFT                  |
|------------------|--------------|-----------------|----------------------------------|
| Vegetation cover | VCF          | Woody           | BL, NL, Shrub                    |
|                  |              | Grass           | C3, C4                           |
|                  |              | Bare soil       | Bare soil                        |
|                  | CCI          | Tree            | BL, NL                           |
|                  |              | Shrub           | Shrub                            |
|                  |              | Grass           | C3, C4                           |
|                  |              | Bare soil       | Bare Soil                        |
| Tree cover       | CCI          | Tree            | BL, NL                           |
|                  |              | Non-tree        | Shrub, C3, C4, Bare soil         |
| Wood cover       | VCF/CCI      | Woody           | BL, NL, shrub                    |
|                  |              | Non-woody       | C3, C4, bare soil                |
| Grass cover      | VCF/CCI      | Grass           | C3, C4                           |
|                  |              | Non-grass       | BL, NL, shrub, bare soil         |
| Leaf type        | VCF/CCI      | BL              | BL                               |
|                  |              | NL              | NL                               |
| BL               | CCI          | BL              | BL                               |
|                  |              | Non-BL          | NL, Shrub, C3, C4, bare soil     |
| NL               | CCI          | NL              | NL                               |
|                  |              | Non-NL          | BL, Shrub, C3, C4, Bare soil     |
| C3               | CCI          | C3              | C3                               |
|                  |              | Non-C3          | BL, NL, Shrub, C4, Bare soil     |
| C4               | CCI          | C4              | C4                               |
|                  |              | Non-C4          | BL, NL, Shrub, C3, C4, Bare soil |
| Shrub            | CCI          | Shrub           | Shrub                            |
|                  |              | Non-Shrub       | BL, NL, C3, C4, Bare soil        |

**Table SI-3: MM comparison combinations. Items column shows vegetation cover items used in equation MM (equation 10), which is the sum of cci/JULES PFT cover. BL = Broadleaf tree PFT; NL = needleleaf; C3 = C3 grass; C4 = C4 grass.**

| Comparison  | Observations Time period      |           | Metric Step | Null Models |                 |                    | JULES           |               |            |                         | Improvement from control |         |         |
|-------------|-------------------------------|-----------|-------------|-------------|-----------------|--------------------|-----------------|---------------|------------|-------------------------|--------------------------|---------|---------|
|             |                               |           |             | Median      | Mean            | Randomly Resampled | S2 - Control    | S3 - Land use | SF2 - fire | SF3 - Land use and fire | S3                       | SF2     | SF3     |
| Life form   | VCF                           | 2002-2012 | MM          | 0.60        | 0.62            | 0.81 +/- 0.0034    | 0.78            | 0.60          | 0.54       | 0.51                    | 30.00%                   | 44.44%  | 52.94%  |
|             | CCI                           | 2010      |             | 0.76        | 0.77            | 0.99 +/- 0.0068    | 0.72            | 0.6           | 0.64       | 0.63                    | 20.00%                   | 12.50%  | 14.29%  |
| Tree Cover  | CCI                           |           |             | 0.39        | 0.4             | 0.51 +/- 0.0048    | 0.35            | 0.28          | 0.3        | 0.3                     | 25.00%                   | 16.67%  | 16.67%  |
| Wood Cover  | VCF                           | 2002-2012 |             | 0.39        | 0.4             | 0.51 +/- 0.0036    | 0.64            | 0.43          | 0.33       | 0.29                    | 48.84%                   | 93.94%  | 120.69% |
|             | CCI                           | 2010      |             | 0.47        | 0.47            | 0.62 +/- 0.0061    | 0.45            | 0.31          | 0.35       | 0.36                    | 45.16%                   | 28.57%  | 25.00%  |
| Grass cover | VCF                           | 2002-2012 |             | 0.46        | 0.47            | 0.63 +/- 0.0057    | 0.64            | 0.48          | 0.43       | 0.42                    | 33.33%                   | 48.84%  | 52.38%  |
|             | CCI                           | 2010      |             | 0.41        | 0.4             | 0.53 +/- 0.0039    | 0.43            | 0.33          | 0.4        | 0.42                    | 30.30%                   | 7.50%   | 2.38%   |
| Bare Soil   | VCF                           | 2002-2012 |             | 0.44        | 0.51            | 0.64 +/- 0.0045    | 0.29            | 0.3           | 0.32       | 0.32                    | -3.33%                   | -10.00% | -10.00% |
|             | CCI                           | 2010      |             | 0.53        | 0.59            | 0.73 +/- 0.0064    | 0.29            | 0.3           | 0.33       | 0.33                    | -3.33%                   | -12.12% | -12.12% |
| Leaf type   | VCF                           | 1992-1993 |             | 0.75        | 0.77            | 0.93 +/- 0.014     | 0.56            | 0.55          | 0.5        | 0.53                    | 1.82%                    | 12.00%  | 5.66%   |
|             | BL<br>NL<br>C3<br>C4<br>Shrub | CCI       |             | 2010        | 0.57            | 0.66               | 0.81 +/- 0.0078 | 0.56          | 0.56       | 0.51                    | 0.54                     | 0.00%   | 9.80%   |
| 0.27        |                               |           |             |             | 0.3             | 0.38 +/- 0.0032    | 0.18            | 0.15          | 0.17       | 0.17                    | 20.00%                   | 5.88%   | 5.88%   |
| 0.16        |                               |           |             |             | 0.23            | 0.27 +/- 0.0021    | 0.25            | 0.22          | 0.18       | 0.17                    | 13.64%                   | 38.89%  | 47.06%  |
| 0.31        |                               |           |             |             | 0.32            | 0.44 +/- 0.0035    | 0.34            | 0.36          | 0.38       | 0.43                    | -5.56%                   | -10.53% | -20.93% |
| 0.23        |                               |           | 0.26        |             | 0.31 +/- 0.0021 | 0.2                | 0.21            | 0.21          | 0.21       | -4.76%                  | -4.76%                   | -4.76%  |         |
| 0.14        |                               |           | 0.14        |             | 0.2 +/- 0.0013  | 0.36               | 0.28            | 0.26          | 0.23       | 28.57%                  | 38.46%                   | 56.52%  |         |

| Comparison                    | Observations    | Time period | Metric | Step | Null Models |                |                    | JULES        |               |            |                         | Improvement from control |         |         |
|-------------------------------|-----------------|-------------|--------|------|-------------|----------------|--------------------|--------------|---------------|------------|-------------------------|--------------------------|---------|---------|
|                               |                 |             |        |      | Median      | Mean           | Randomly Resampled | S2 - Control | S3 - Land use | SF2 - fire | SF3 - Land use and fire | S3                       | SF2     | SF3     |
| Vegetative Carbon             | Avitabile et al | 2000-2010   | NME    | 1    | 0.96        | 1              | 1.32 +/- 0.014     | 0.85         | 0.84          | 0.96       | 0.98                    | 1.19%                    | -11.46% | -13.27% |
|                               |                 |             |        | 2    |             |                |                    | 0.79         | 0.75          | 0.75       | 0.76                    | 5.33%                    | 5.33%   | 3.95%   |
|                               |                 |             |        | 3    |             |                |                    | 0.8          | 0.74          | 0.74       | 0.74                    | 8.11%                    | 8.11%   | 8.11%   |
| Spatial Burnt Area            | Meris           | 2006-2009   | NME    | 1    | 0.71        | 1              | 1.13 +/- 0.072     |              |               | 0.95       | 0.95                    |                          |         | 0.00%   |
|                               |                 |             |        | 2    |             |                |                    |              |               | 0.92       | 0.92                    |                          |         | 0.00%   |
|                               |                 |             |        | 3    |             |                |                    |              |               | 0.93       | 0.93                    |                          |         | 0.00%   |
|                               | MCD45           | 2001-2008   | NME    | 1    | 0.72        | 1              | 1.15 +/- 0.0028    |              |               | 0.91       | 0.91                    |                          |         | 0.00%   |
|                               |                 |             |        | 2    |             |                |                    |              |               | 0.87       | 0.87                    |                          |         | 0.00%   |
|                               |                 |             |        | 3    |             |                |                    |              |               | 0.88       | 0.88                    |                          |         | 0.00%   |
|                               | GFED4           | 1997-2014   | NME    | 1    | 0.72        | 1              | 1.14 +/- 0.0066    |              |               | 0.84       | 0.84                    |                          |         | 0.00%   |
|                               |                 |             |        | 2    |             |                |                    |              |               | 0.8        | 0.8                     |                          |         | 0.00%   |
|                               |                 |             |        | 3    |             |                |                    |              |               | 0.84       | 0.84                    |                          |         | 0.00%   |
| GFED4s                        | 1997-2014       | NME         | 1      | 0.75 | 1           | 1.19 +/- 0.023 |                    |              | 0.8           | 0.8        |                         |                          | 0.00%   |         |
|                               |                 |             | 2      |      |             |                |                    |              | 0.79          | 0.79       |                         |                          | 0.00%   |         |
|                               |                 |             | 3      |      |             |                |                    |              | 0.87          | 0.86       |                         |                          | 1.16%   |         |
| Seasonal phase                | GFED4           | 1997-2014   | MPD    |      | 0.53        | 0.48           | 0.49 +/- 0.00042   |              |               | 0.37       | 0.37                    |                          |         | 0.00%   |
|                               | GFED4s          | 1997-2014   |        |      | 0.51        | 0.49           | 0.49 +/- 0.00098   |              |               | 0.35       | 0.35                    |                          |         | 0.00%   |
| Spatial fire carbon emissions | GFAS            | 2000-2009   | NME    | 1    | 0.78        | 1              | 1.21 +/- 0.0032    |              |               | 0.77       | 0.76                    |                          |         | 1.32%   |
|                               |                 |             |        | 2    |             |                |                    |              |               | 0.89       | 0.9                     |                          |         | -1.11%  |
|                               |                 |             |        | 3    |             |                |                    |              |               | 1.02       | 1.02                    |                          |         | 0.00%   |

**Table SI-4: Benchmarking results for experiments with disturbance added. Lower results for all metrics indicates results that are closer to observations, with a perfect score being 0. Colours indicate how many null models the configuration exceeds: Blue = all; green = all but one; yellow = only exceeds one; red = none exceeded. Grey shading indicates the most improvement, with the darkest being the best.**
